# Supplementary material
Source: publisher site journal article supplement (https://www.dovepress.com/article/192672)
Supplement: Supplementary file 1 [file get_supplementary_file.php]

**Appendix One**: Psychometric Validation Requirements and Criteria

| **Property** | **Criteria for Acceptability** |
| --- | --- |
| **User-Centredness:** Extent to which the measure captures the perspectives of key stakeholders (patient, carer, practitioner) | Comprehensive coverage of user-identified domains as assessed by patients with a PHC and specialist hip practitioners  Positive comments on face validity and coverage of content |
| **Acceptability:** Extent to which the data are well completed and understandable. | Evidence from patients on scale administration and intelligibility  Missing data for individual items, <5% of cases; and of individual items for summary score ≤10% of total score items  Maximum endorsement frequencies (of each response category) of <80%, including floor/ceiling effects (<80% at the bottom/top ends of the scale)  Skewness values between +1 and -1  Summary score spread |
| **Practicality:** Ability of the measure to be completed in a non-burdensome length of time | Measure completed within 15-20 minutes  Evidence on acceptability and missing items |
| **Item Analysis / Reduction:** To identify possible items for elimination due to weak psychometric performance | Principal component factor analysis:  All items to load on the first unrotated factor >.40  Item analysis (for all items):  Missing data < 10%  No item redundancy (inter-item correlation ≤.75)  Item-total correlation ≥.25  Maximum endorsement frequencies (of each response category) of <80%, including floor/ceiling effects >80% at the bottom/top ends of the scale |
| **Reliability - Internal Consistency:** Extent to which items comprising a scale measure the same construct; assessed by Cronbach’s α and item-total correlations | Cronbach’s α coefficients for summary scores > 0.70  Item-total correlations ≥.25 |
| **Reliability – Test-Retest:** Stability of the measuring instrument; assessed by administering it to respondents on two different occasions and examining intra-class correlation (ICC) between scores | This area remains to be studied, as part of future research |
| **Content Validity**: Extent to which the content of the scale is representative of the intended conceptual domain; assessed through testing with patients and specialist hip practitioners | Evidence from piloting with patients and specialist hip practitioners  All content centred on quality of life impact, concerns and experiences with PHCs, including pain, sports & exercise, family life, social relationships and psychological impact, including confidence, depression, self-esteem and body image |
| **Construct Validity - Within-Scale Analysis** Evidence that a single construct is being measured and items can be combined to form a summary score; assessed on the basis of good internal consistency and stability of correlations between the scale and sub-scale scores | Internal consistency (Cronbach’s α > 0.70)  Evidence from factor analysis of single construct being measured (all items to load on the first unrotated factor >.40)  Moderate (>.5) to high correlations between the sub-scales |
| **Construct Validity - Convergent Validity:** Evidence that the scale is correlated with other measures of the same or similar construct | High correlation (>0.75) between i-HOT-12 and QoLC&I  Moderate to good correlation (>0.4) between GHQ and QoLC&I |
| **Construct Validity – Divergent Validity:** Evidence that the scale is unrelated to a measure that it is not supposed to measure | Low correlation (<0.25) between GSE and QoLC&I |

**Appendix Two:** The‘Quality of Life, Concerns and Impact Measure’ (QoLC&I) Measure


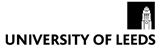

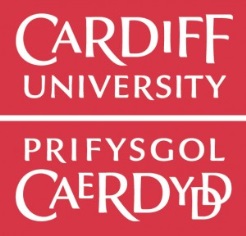


**A Questionnaire to Explore the Concerns and**

**Quality of Life Impacts and Consequences**

**of Paediatric Hip Conditions**

Please can you complete the following questionnaire? It comprises a set of questions that we have developed with and for persons who have a diagnosis of Hip Dysplasia, Perthes or SUFE;

Please complete all the questions. For your ease, most of the questions can be answered by ticking a box. Others ask you to write in your own words about the quality of life impacts that you have or are experiencing *because of your hip condition*. When you have completed the questionnaire, *either* give it back to the nurse who gave it to you, *or* send it back in the attached FREEPOST envelope, *or via e-mail* to [Gamblingts@cardiff.ac.uk](mailto:GamblingTS@cardiff.ac.uk).

You will notice that we are asking you to write in your name and full contact details. This will enable us to send you any subsequent questionnaires and to provide you with feedback on the project’s results. We assure you that your responses will be treated in confidence and all data will be anonymised during the analysis and subsequent verbal and written reports. Thank you for your help with our research.

Dr Tina Gambling (Cardiff University) and Prof Andrew Long (University of Leeds)

## **First of all, would you please provide your contact details and some personal information?**

Name: Date questionnaire completed:

Address:

e-mail (if any):

**PAIN:**

**Can you tell us about the pain you may be experiencing because of your hip condition?** *Please rate your level of agreement with each of the statements below. Put a cross in the box or circle the relevant number that best describes how you feel now. If the comments in each statement have no impact, please rate this as ‘strongly disagree=0’.*

| **Statement** | **Strongly Disagree** | **Disagree** | **In-Between** | **Agree** | **Strongly Agree** | **Not Relevant** |
| --- | --- | --- | --- | --- | --- | --- |
| I am in pain pretty much all the time. | 0 | 1 | 2 | 3 | 4 | 8 |
| The aches and pains have become more frequent and more painful. | 0 | 1 | 2 | 3 | 4 | 8 |
| I have to pace myself each day to manage the pain; if I do too much one day I pay for it the next day. | 0 | 1 | 2 | 3 | 4 | 8 |
| The aches and pains have become more frequent and more painful. | 0 | 1 | 2 | 3 | 4 | 8 |
| The pain affects my concentration. | 0 | 1 | 2 | 3 | 4 | 8 |
| I have to take painkillers just to get through the day. | 0 | 1 | 2 | 3 | 4 | 8 |
| At times I find myself in a lot of pain after walking when out with friends in just trying to do everyday things. | 0 | 1 | 2 | 3 | 4 | 8 |
| I have to think every day about what I will do and how far I will have to walk. | 0 | 1 | 2 | 3 | 4 | 8 |
| **Statement** | **Strongly Disagree** | **Disagree** | **In-Between** | **Agree** | **Strongly Agree** | **Not Relevant** |
| I have had to learn to pace myself; if I do a lot one day the next I have to try to rest. | 0 | 1 | 2 | 3 | 4 | 8 |
| It’s distressing and l to sense my physical capability decreasing as my hip condition progresses. | 0 | 1 | 2 | 3 | 4 | 8 |
| I walk with a slight waddle/swaying motion and a forward tilt. | 0 | 1 | 2 | 3 | 4 | 8 |

## **IMPACT ON EDUCATION & WORK:**

## **Can you now tell us about the impact arising because of your hip condition in relation to your education and working life?** Please rate your level of agreement with each of the statements below. Put a cross in the box or circle the relevant number that best describes how you feel now. If the comments in each statement have no impact, please rate this as ‘strongly disagree=0’.

| **Statement** | **Strongly Disagree** | **Disagree** | **In-Between** | **Agree** | **Strongly Agree** | **Not Relevant** |
| --- | --- | --- | --- | --- | --- | --- |
| My hip condition led to some depression that made things really tough. | 0 | 1 | 2 | 3 | 4 | 8 |
| I found it really hard to form relationships at school/work because of my hip condition. | 0 | 1 | 2 | 3 | 4 | 8 |
| My hip condition makes it hard for me to always maintain concentration. | 0 | 1 | 2 | 3 | 4 | 8 |

**PARTICIPATION IN SPORT & EXERCISE:**

**Can you now tell us about the impact arising because of your hip condition in relation to your participation in sports and exercise*?*** *Please rate your level of agreement with each of the statements below. Put a cross in the box or circle the relevant number that best describes how you feel now. If the comments in each statement have no impact, please rate this as ‘strongly disagree=0’.*

| **Statement** | **Strongly Disagree** | **Disagree** | **In-Between** | **Agree** | **Strongly Agree** | **Not Relevant** |
| --- | --- | --- | --- | --- | --- | --- |
| I am only able to do low impact activities. | 0 | 1 | 2 | 3 | 4 | 8 |
| I used to love being active, being outside, going to the gym but, because of my hips, there is little I can do now. | 0 | 1 | 2 | 3 | 4 | 8 |
| I want to stay fit and in shape, but because of my hip it has become harder and harder to find activities I can do. | 0 | 1 | 2 | 3 | 4 | 8 |
| I am very conscious about my weight and how my body looks due to my restricted mobility and restricted exercise that I can do. | 0 | 1 | 2 | 3 | 4 | 8 |
| Now I can only do low impact activities such as swimming or walking. | 0 | 1 | 2 | 3 | 4 | 8 |
| I worry about making my hip worse when doing sports and activity. | 0 | 1 | 2 | 3 | 4 | 8 |

**IMPACT ON FAMILY LIFE:**

**Can you now tell us about the impact arising because of your hip condition on/for your family life?***Please rate your level of agreement with each of the statements below. Put a cross in the box or circle the relevant number that best describes how you feel now. If the comments in each statement have no impact, please rate this as ‘strongly disagree=0’.*

| **Statement** | **Strongly Disagree** | **Disagree** | **In-Between** | **Agree** | **Strongly Agree** | **Not Relevant** |
| --- | --- | --- | --- | --- | --- | --- |
| I feel I have lost out on a time when I should have been enjoying myself. | 0 | 1 | 2 | 3 | 4 | 8 |
| It upsets me that my partner and/or family or parents have to care for me. | 0 | 1 | 2 | 3 | 4 | 8 |
| I don’t get to spend quality time with my partner and/or family or parents because they spend so much time caring for me | 0 | 1 | 2 | 3 | 4 | 8 |

## **PHYSICAL INTIMACY:**

## **If you are age 18 or over, can you tell us about the impact arising because of your hip condition on or for your** **physical intimacy**? Please rate your level of agreement with each of the statements below. Put a cross in the box or circle the relevant number that best describes how you feel now. If the comments in each statement have no impact, please rate this as ‘strongly disagree=0’.

| **Only complete this section, if you are *aged 18 or over*.** | **Strongly Disagree** | **Disagree** | **In-Between** | **Agree** | **Strongly Agree** | **Not Relevant** |
| --- | --- | --- | --- | --- | --- | --- |
| Since my hip pain has got worse, I haven't been in the mood for sex. | 0 | 1 | 2 | 3 | 4 | 8 |
| Hip dysplasia has a big effect on your love life one way or another. | 0 | 1 | 2 | 3 | 4 | 8 |
| The intimacy between us has diminished because of my hip. | 0 | 1 | 2 | 3 | 4 | 8 |

**IMPACT OF SOCIAL LIFE & RELATIONSHIPS**:

**Can you now tell us you about the impact arising because of your hip condition on your social life and relationship with friends and others outside of your immediate family?***Please rate your level of agreement with each of the statements below. Put a cross in the box or circle the relevant number that best describes how you feel now. If the comments in each statement have no impact, please rate this as ‘strongly disagree=0’.*

| **Statement** | **Strongly Disagree** | **Disagree** | **In-Between** | **Agree** | **Strongly Agree** | **Not Relevant** |
| --- | --- | --- | --- | --- | --- | --- |
| I feel uncomfortable and find it difficult explaining about my hips. | 0 | 1 | 2 | 3 | 4 | 8 |
| I struggle to trust people, fear rejection and don’t go out much to meet new people. | 0 | 1 | 2 | 3 | 4 | 8 |
| I have stopped dating now. | 0 | 1 | 2 | 3 | 4 | 8 |
| My social life suffers as I try to minimise any trip that involves going outside or much activity. | 0 | 1 | 2 | 3 | 4 | 8 |
| I am having or have had to put my social life on hold. | 0 | 1 | 2 | 3 | 4 | 8 |

**IMPACT ON CONFIDENCE & ESTEEM:**

**Can you now tell us you about the impact arising because of your hip condition on your confidence and self-esteem**? *Please rate your level of agreement with each of the statements below. Put a cross in the box or circle the relevant number that best describes how you feel now. If the comments in each statement have no impact, please rate this as ‘strongly disagree=0’.*

| **Statement** | **Strongly Disagree** | **Disagree** | **In-Between** | **Agree** | **Strongly Agree** | **Not Relevant** |
| --- | --- | --- | --- | --- | --- | --- |
| I feel so low in confidence I have just withdrawn from the world for a while. | 0 | 1 | 2 | 3 | 4 | 8 |
| My confidence and self-esteem are very low because of my hip condition. | 0 | 1 | 2 | 3 | 4 | 8 |
| My confidence has decreased since my hip condition has worsened. | 0 | 1 | 2 | 3 | 4 | 8 |
| **Statement** | **Strongly Disagree** | **Disagree** | **In-Between** | **Agree** | **Strongly Agree** | **Not Relevant** |
| My outward appearance (scarring, posture and/or limp) has had a profound effect on my self-esteem. | 0 | 1 | 2 | 3 | 4 | 8 |
| I am very self-conscious about my hip condition. | 0 | 1 | 2 | 3 | 4 | 8 |
| I have lost my sense of self; my hips are taking/have taken over my life. | 0 | 1 | 2 | 3 | 4 | 8 |

**IMPACT ON BODY IMAGE:**

**Can you now tell us about the impact arising because of your hip condition on your body image?** *Please rate your level of agreement with each of the statements below. Put a cross in the box or circle the relevant number that best describes how you feel now. If the comments in each statement have no impact, please rate this as ‘strongly disagree=0’.*

| **Statement** | **Strongly Disagree** | **Disagree** | **In-Between** | **Agree** | **Strongly Agree** | **Not Relevant** |
| --- | --- | --- | --- | --- | --- | --- |
| Because of my hip, I feel embarrassed with the whole ‘getting undressed’, putting on my working-out clothes, scarring and limping. | 0 | 1 | 2 | 3 | 4 | 8 |
| Because of my hip, I don’t feel good about my body. | 0 | 1 | 2 | 3 | 4 | 8 |
| Because of my hip, I feel I hate my body. | 0 | 1 | 2 | 3 | 4 | 8 |
| Because of my hip, I feel overweight and unattractive. | 0 | 1 | 2 | 3 | 4 | 8 |
| Because of my hip, I am self-conscious about the clothes I wear. | 0 | 1 | 2 | 3 | 4 | 8 |
| Because of my hip, I don’t wear tight clothes or shorts or anything that emphasises my legs or hips. | 0 | 1 | 2 | 3 | 4 | 8 |
| **Statement** | **Strongly Disagree** | **Disagree** | **In-Between** | **Agree** | **Strongly Agree** | **Not Relevant** |
| I am very self-conscious about my uneven gait or using a walking stick. | 0 | 1 | 2 | 3 | 4 | 8 |

**IMPACT ON EMOTIONS:**

**We would now like to find out about the impact arising *because of your hip condition* on *your emotions*.** *Please rate your level of agreement with each of the statements below. Put a cross in the box or circle the relevant number that best describes how you feel now. If the comments in each statement have no impact, please rate this as ‘strongly disagree=0’.*

| **Statement** | **Strongly Disagree** | **Disagree** | **In-Between** | **Agree** | **Strongly Agree** | **Not Relevant** |
| --- | --- | --- | --- | --- | --- | --- |
| I feel angry and emotional at times; I have lost out on so many things. | 0 | 1 | 2 | 3 | 4 | 8 |
| I have become increasingly frustrated about losing my independence and having to depend on others to do things for me. | 0 | 1 | 2 | 3 | 4 | 8 |
| I feel lost at the moment and I am not the person I want to be. | 0 | 1 | 2 | 3 | 4 | 8 |
| My hip condition depresses me. | 0 | 1 | 2 | 3 | 4 | 8 |
| People don’t understand that some days I can do most things but on others I can hardly do anything. | 0 | 1 | 2 | 3 | 4 | 8 |
| The pain makes me emotional and tearful. | 0 | 1 | 2 | 3 | 4 | 8 |

**IMPACT OF OVERALL QUALITY OF LIFE**:

**We would like to ask you about the impact arising *because of your hip condition* on *your overall quality of life*.** *Please rate your level of agreement with each of the statements below. Put a cross in the box or circle the relevant number that best describes how you feel now. If the comments in each statement have no impact, please rate this as ‘strongly disagree=0’.*

| **Statement** | **Strongly Disagree** | **Disagree** | **In-Between** | **Agree** | **Strongly Agree** | **Not Relevant** |
| --- | --- | --- | --- | --- | --- | --- |
| I want to stay fit and in shape but my hip makes this difficult. | 0 | 1 | 2 | 3 | 4 | 8 |
| My life is very disrupted by my hip condition. | 0 | 1 | 2 | 3 | 4 | 8 |
| I am forgetting what it is like not to be dominated by pain and not being able to do things. | 0 | 1 | 2 | 3 | 4 | 8 |
| I feel generally down and get upset because of my hips and their impact on my life. | 0 | 1 | 2 | 3 | 4 | 8 |
| I have had to adjust my life and what I do in order to cope with my hips. | 0 | 1 | 2 | 3 | 4 | 8 |
| It is an emotional and a physical battle because of my hip. | 0 | 1 | 2 | 3 | 4 | 8 |
| I feel I have lost a lot of my life and identity. | 0 | 1 | 2 | 3 | 4 | 8 |
| I have had to give up things until I no longer have a normal life. | 0 | 1 | 2 | 3 | 4 | 8 |

| **Statement** | **Strongly Disagree** | **Disagree** | **In-Between** | **Agree** | **Strongly Agree** | **Not Relevant** |
| --- | --- | --- | --- | --- | --- | --- |
| I struggle to cope with work or my education. | 0 | 1 | 2 | 3 | 4 | 8 |
| I don’t feel good about myself. | 0 | 1 | 2 | 3 | 4 | 8 |
| I am tired and fatigued from the toil and ongoing pressure of my hip condition. | 0 | 1 | 2 | 3 | 4 | 8 |
| My life is very disrupted by my hip condition. | 0 | 1 | 2 | 3 | 4 | 8 |
| Looking overall, my hip condition has had a big impact on my life. | 0 | 1 | 2 | 3 | 4 | 8 |
| I value my independence; the thought of not being able to look after myself and being a burden to others in the future is devastating. | 0 | 1 | 2 | 3 | 4 | 8 |

**OVERALL CONCERN AND IMPACT OF HIP CONDITION:**

**Overall, please rate your overall concern and impact on your pain, discomfort and quality of life.** *Please rate this on a* scale from 1 to 10. A score of ‘1’ would represent, *‘I am very dissatisfied/finding it very hard to cope’*. In contrast, a score of ‘10’ would represent, *‘I am very satisfied/coping very well’*.

**-----------** (score from 1 to 10)

**OVERALL HEALTH IN GENERAL:**

**Apart from the hip problems you have, would you say your health *in general* is now:**

Excellent Very Good Good Fair Poor

**Apart from the hip problems you have, how would you rate your health *in general* compared to *about 3 months* ago?**

Much Better Somewhat Better About the Same Somewhat Worse Much Worse

Now Now Now Now

**OVERALL HEALTHCARE TREATMENT SATISFACTION:**

**Please rate your overall satisfaction with the specialist treatment and care you are *currently* receiving for your Hip Dysplasia, Perthes or SUFE.**

Excellent Very Good Good Fair Poor

**Please turn over the page for the final questions and instructions about returning the questionnaire. Thank you.**

**GREATEST HOPES & WORST FEARS:**

**Finally, we would like to ask you about your greatest hope and worst fear about your quality of life overall, and the impact and consequences arising *because of your hip(s).***

*(a) My greatest hope is*

…………………………………………………………………………………………………………………………………………………………………………………………………………………………

…………………………………………………………………………………………………………………………………………………………………………………………………………………………

…………………………………………………………………………………………………………………………………………………………………………………………………………………………

*(b) My worst fear is*

…………………………………………………………………………………………………………………………………………………………………………………………………………………………

…………………………………………………………………………………………………………………………………………………………………………………………………………………………

…………………………………………………………………………………………………………………………………………………………………………………………………………………………

(c)  *If there is anything else affecting your quality of life arising because of your hip(s) that is of great importance or significance at the present time*, and that has not been covered in your previous responses above, please write it below in the space provided.

…………………………………………………………………………………………………………………………………………………………………………………………………………………………

…………………………………………………………………………………………………………………………………………………………………………………………………………………………

| Thank you very much for taking the time to complete this questionnaire and for your involvement in our research and for completing this questionnaire.  Please now *either* give the completed questionnaire back to the nurse who gave it to you, *or* send it back in the attached FREEPOST envelope, *or via e-mail* to [Gamblingts@cardiff.ac.uk](mailto:GamblingTS@cardiff.ac.uk). |
| --- |
